# Supplementary material for: Facilitating Anti-Cancer Combinatorial Drug Discovery by Targeting Epistatic Disease Genes
Source: MDPI journal article supplement (doi:10.3390/molecules23040736), 2018-03-23
Supplement: s1 [file s1]

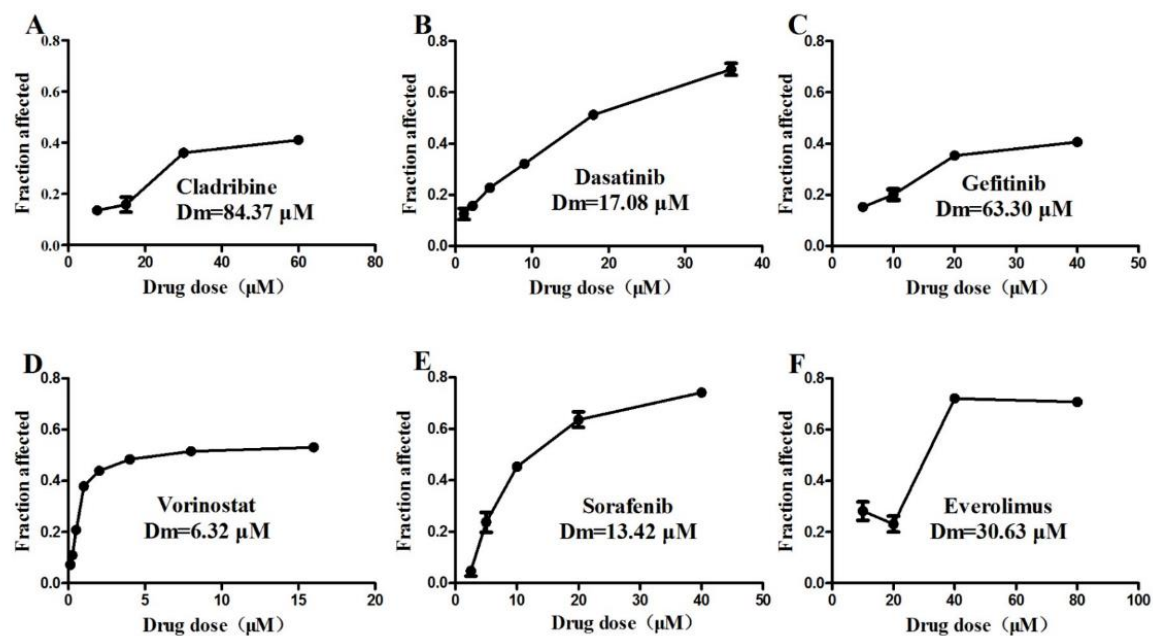

Figure S1 Anti-breast cancer effects of the six drugs contained in nine predicted combinatorial drugs. Six drugs were respectively incubated with MCF-7 cells for 48 h. The viabilities of cells were determined via 3-(4,5-dimethylthiazol-2-yl)-2,5-diphenyltetrazolium bromide (MTT) assay (Sigma-Aldrich, U.S.A.) and reported as fraction affected (fraction of cells affected by treatment). The data represented the mean $\pm$ S.D. from five replicate experiments.

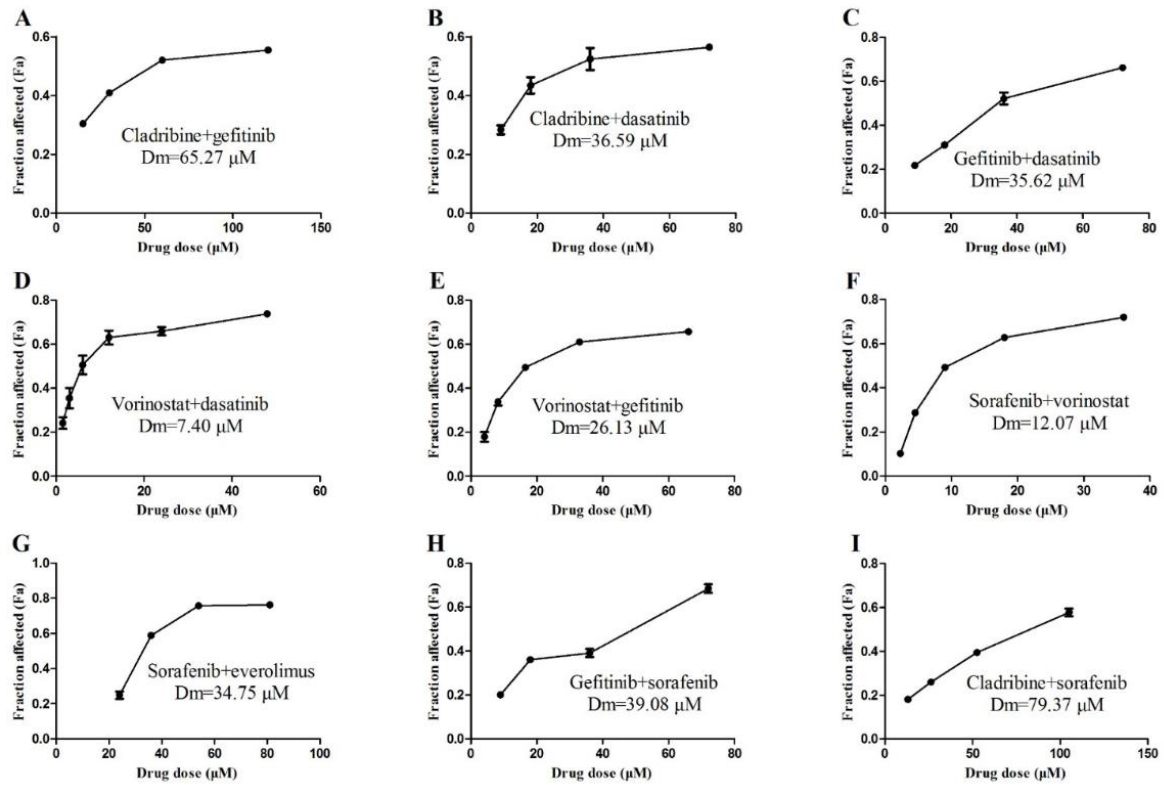

Figure S2 Synergistic anti-breast cancer effects of nine predicted combinatorial drugs. Combinatorial drugs with a fixed dose ratio were respectively incubated with MCF-7 cells for 48 h. The viabilities of cells were determined via 3-(4,5-dimethylthiazol-2-yl)-2,5-diphenyltetrazolium bromide (MTT) assay (Sigma-Aldrich, U.S.A.) and reported as fraction affected (fraction of cells affected by treatment). The data represented the mean±S.D. from five replicate experiments.
